# Supplementary material for: States with fewer criminalizing immigrant policies have smaller health care inequities between citizens and noncitizens
Source: PubMed Central journal article supplement (PMC7558673; doi:10.1186/s12889-020-09525-4), 2020-10-15

### Appendix C. Predicted probability of having a usual source of care across levels of criminalization

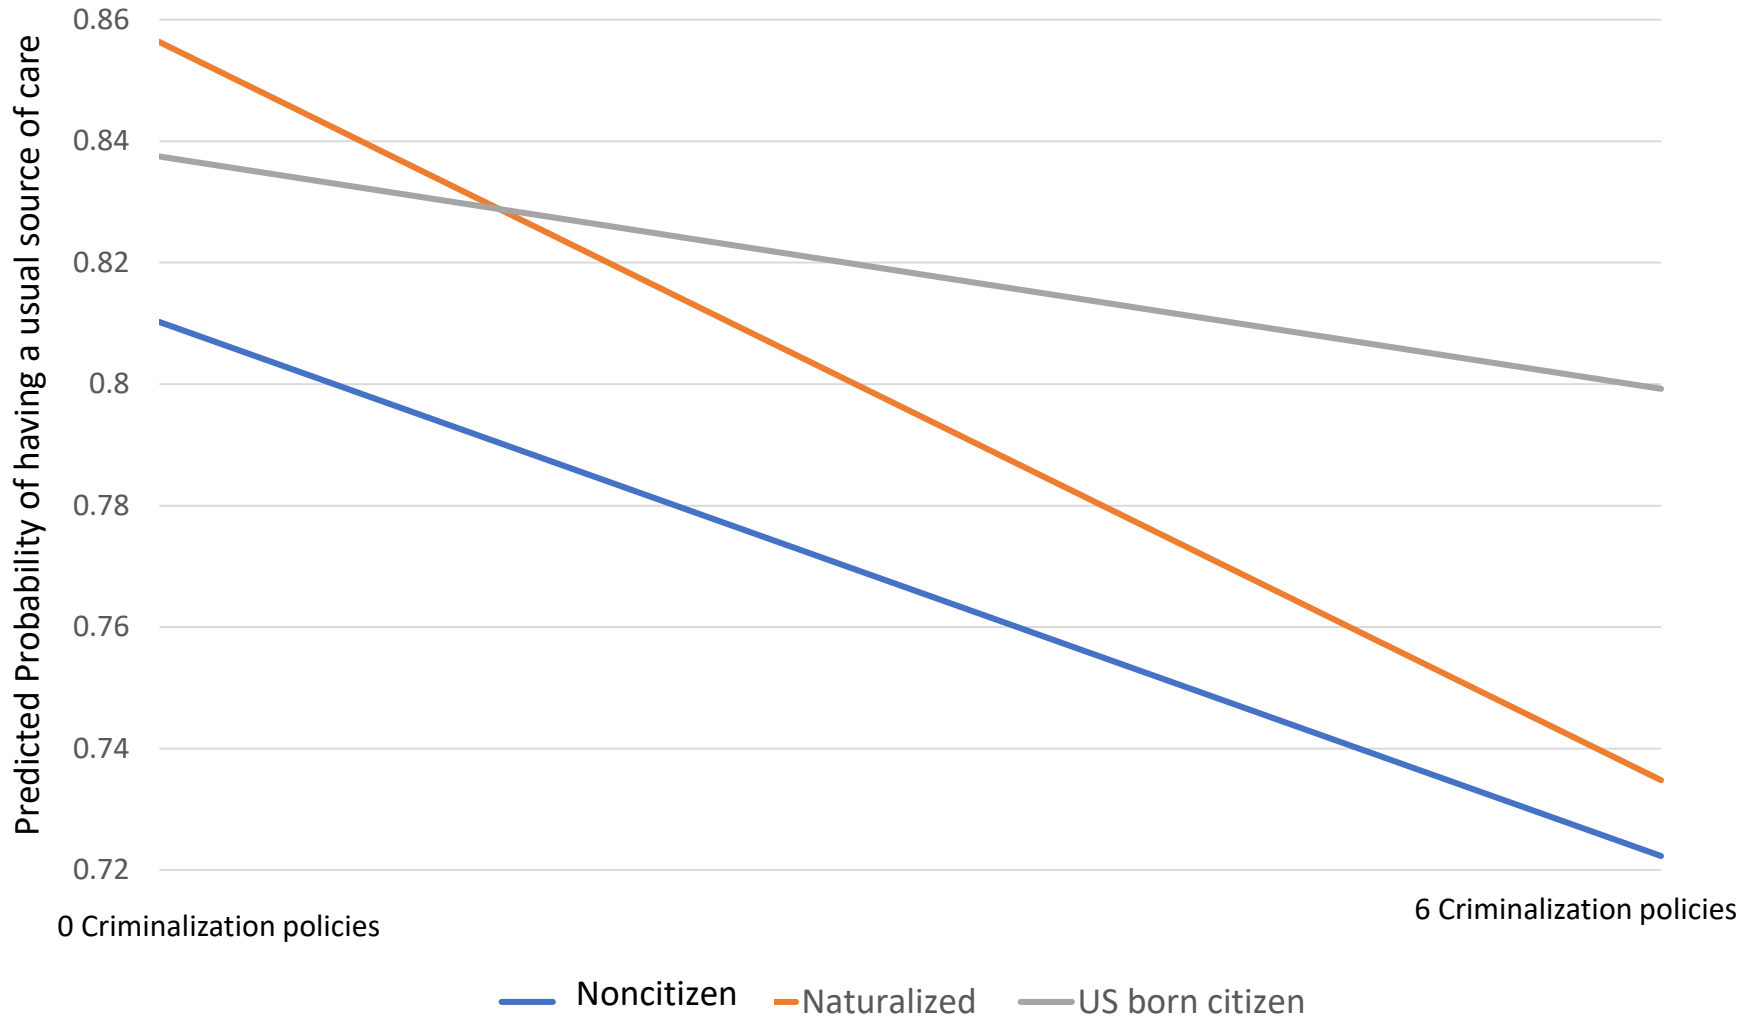

Supplement: 12889_2020_9525_MOESM3_ESM.pdf [file 12889_2020_9525_MOESM3_ESM.pdf]
